# Supplementary material for: Association Between Vertebral Arterial Tortuosity and Aneurysm Growth in Intracranial Vertebral Artery Dissection
Source: PubMed Central journal article supplement — J Clin Neurol. 2024 Aug 2;20(6):617–23. doi: 10.3988/jcn.2024.0139 (PMC11543393; doi:10.3988/jcn.2024.0139), 2024-08-02
Supplement: jcn-20-617-s001.pdf [file jcn-20-617-s001.pdf]

**Supplementary Table 1.** Cutoff value of vascular geometric factors influencing iVADA growth

| Vascular geometry | AUC                 | Cutoff (sensitivity/specificity) | <i>p</i> |
|-------------------|---------------------|----------------------------------|----------|
| VTI               | 0.633 (0.529–0.738) | 1.065 (0.630/0.618)              | 0.015    |
| Aneurysm size     | 0.571 (0.464–0.677) | 5.965 (0.529/0.525)              | 0.198    |
| BA-ipsiVA angle   | 0.451 (0.343–0.559) | 152.755 (0.431/0.443)            | 0.370    |
| VA-VA angle       | 0.597 (0.491–0.702) | 49.815 (0.459/0.541)             | 0.079    |
| Aneurysm ratio    | 0.571 (0.463–0.679) | 2.355 (0.529/0.541)              | 0.198    |

AUC, area under the receiver operating characteristic curve; BA, basilar artery; ipsiVA, ipsilateral VA; iVADA, intracranial vertebral artery dissecting aneurysm; VA, vertebral artery; VTI, vertebral artery tortuosity index.
