# Supplementary material for: Association Between Vertebral Arterial Tortuosity and Aneurysm Growth in Intracranial Vertebral Artery Dissection
Source: PubMed Central journal article supplement — J Clin Neurol. 2024 Aug 2;20(6):617–23. doi: 10.3988/jcn.2024.0139 (PMC11543393; doi:10.3988/jcn.2024.0139), 2024-08-02
Supplement: jcn-20-617-s002.pdf [file jcn-20-617-s002.pdf]

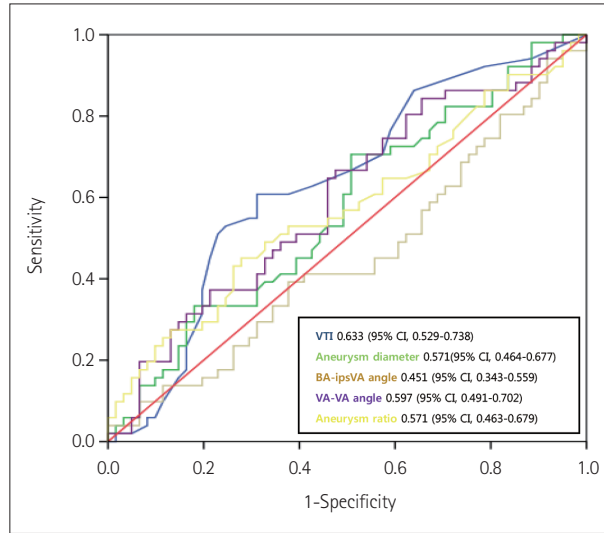

**Supplementary Fig. 1.** ROC curve for prediction of growth of IVADA vascular geometric factors. ROC curve for prediction of growth of IVADA by VTI (blue), aneurysm diameter (green), BA-ipsiVA angle (ivoy), VA-VA angle (purple) and aneurysm ratio (yellow). Results are presented as an odds ratio and 95% CIs. BA, basilar artery; CI, confidence interval; ipsiVA, ipsilateral VA; IVADA, intracranial vertebral artery dissecting aneurysm; ROC, receiver operating characteristic; VA, vertebral artery; VTI, vertebral artery tortuosity index.
